# Supplementary material for: The Association of Folic Acid, Iron Nutrition during Pregnancy and Congenital Heart Disease in Northwestern China: A Matched Case-Control Study
Source: MDPI journal article supplement (doi:10.3390/nu14214541), 2022-10-28
Supplement: s1 [file s1]

# The Association of Folic Acid, Iron Nutrition during Pregnancy and Congenital Heart Disease in

## Northwestern China: A Matched Case-Control Study

Ming-Xin Yan <sup>1</sup>, Yan Zhao <sup>2</sup>, Dou-Dou Zhao <sup>3</sup>, Shao-Nong Dang <sup>1</sup>, Ruo Zhang <sup>1</sup>, Xin-Yu Duan <sup>1</sup>, Pei-Xi

Rong <sup>1</sup>, Yu-Song Dang <sup>1</sup>, Lei-Lei Pei <sup>1,\*</sup> and Peng-Fei Qu <sup>2,\*</sup>

<sup>1</sup> Department of Epidemiology and Biostatistics, School of Public Health, Xi'an Jiaotong University Health Science Center, Xi'an 710061, China

<sup>2</sup> The First Affiliated Hospital of Xi'an Jiaotong University Dermatology, Xi'an 710061

<sup>3</sup> ChinaTranslational Medicine Center Northwest Women's and Children's Hospital, Xi'an 710061, China

\*Corresponding: pll\_paper@126.com (L.-L.P.); xinxi3057@163.com (P.-F.Q.)

**Supplementary Table S1.** Types of congenital heart disease.

| Congenital heart disease              | Number | Proportion (%) |
|---------------------------------------|--------|----------------|
| Ventricular septal defect (VSD)       | 187    | 31.17          |
| Atrial septal defect (ASD)            | 75     | 12.50          |
| Patent ductus arteriosus (PDA)        | 75     | 12.50          |
| Atrioventricular septal defect (AVSD) | 51     | 8.50           |
| Tetralogy of Fallot (TOF)             | 45     | 7.50           |
| Congenital aortic (valve) stenosis    | 14     | 2.33           |
| Pulmonary artery (valve) stenosis     | 39     | 6.50           |
| Aortic constriction                   | 10     | 1.67           |
| Transposition of the aorta            | 9      | 1.50           |
| Pulmonary artery atresia              | 5      | 0.83           |
| Tricuspid atresia                     | 14     | 2.33           |
| Arterial Stem Forever                 | 3      | 0.50           |
| Hypoplastic left heart syndrome       | 12     | 2.00           |
| Interrupted aortic arch               | 9      | 1.50           |
| Others                                | 52     | 8.67           |
| Total                                 | 600    | 100.00         |

**Supplementary Table S2.** Interaction of maternal folic acid and iron nutrition in incidence of different subtypes of CHD.

| Variables                         | Folic acid<br>supplementation <sup>c</sup> | VSD(N=187) <sup>d</sup><br>OR (95%CI) | ASD(N=75) <sup>d</sup><br>OR (95%CI) | PDA(N=75) <sup>d</sup><br>OR (95%CI) |
|-----------------------------------|--------------------------------------------|---------------------------------------|--------------------------------------|--------------------------------------|
| Iron supplementation <sup>a</sup> |                                            |                                       |                                      |                                      |
| 0                                 | 0                                          | 1.00                                  | 1.00                                 | 1.00                                 |
| 1                                 | 0                                          | 0.30(0.08, 1.12)                      | 0.21(0.04, 1.10)                     | 0.12(0.02, 0.99)                     |
| 0                                 | 1                                          | 0.54(0.25, 1.15)                      | 0.47(0.19, 1.21)                     | 0.34(0.13, 0.89)                     |
| 1                                 | 1                                          | 0.21(0.09, 0.51)                      | 0.15(0.04, 0.51)                     | 0.23(0.08, 0.72)                     |
| Dietary iron intake <sup>b</sup>  |                                            |                                       |                                      |                                      |
| 0                                 | 1                                          | 1.00                                  | 1.00                                 | 1.00                                 |
| 1                                 | 0                                          | 0.46(0.10, 2.11)                      | 0.93(0.17, 5.00)                     | 0.79(0.17, 3.66)                     |
| 0                                 | 1                                          | 0.57(0.27, 1.19)                      | 0.61(0.23, 1.61)                     | 0.58(0.19, 1.72)                     |
| 1                                 | 1                                          | 0.42(0.19, 0.97)                      | 0.51(0.17, 1.59)                     | 0.22(0.06, 0.81)                     |

<sup>a</sup> 0 = No and 1 = Yes. <sup>b</sup> 0= "<29 mg/d", 1= "≥29 mg/d". <sup>c</sup> 0 = No and 1 = Yes. <sup>d</sup> Adjusted for age, ethnicity, education, residence, wealth index, cold in early pregnancy, fever in early pregnancy, drinking, passive smoke, hair dyeing and perming, gravidity.

**Supplementary Table S3.** Multiplication and additive interaction of folic acid and iron nutrition in

incidence of different subtypes of CHD.

| Variables            | Interactions                                         | VSD(N=187) <sup>d</sup> | ASD(N=75) <sup>d</sup> | PDA(N=75) <sup>d</sup> |
|----------------------|------------------------------------------------------|-------------------------|------------------------|------------------------|
| Multiplication model | Folic acid supplementation<br>× Iron supplementation | 0.36(0.20, 0.65)        | 0.30(0.12, 0.76)       | 0.60(0.27, 1.32)       |
| Additive model       | RERI <sup>a</sup>                                    | 0.37(-0.08, 0.82)       | 0.46(-0.13, 1.05)      | 0.77(0.40, 1.14)       |
|                      | S <sup>b</sup>                                       | 0.68(0.48, 0.96)        | 0.65(0.43, 0.99)       | 0.50(0.38, 0.65)       |
|                      | AP <sup>c</sup>                                      | 1.78(-1.60, 5.16)       | 3.19(-3.58, 9.96)      | 3.30(-1.02, 7.61)      |
| Multiplication model | Folic acid supplementation<br>× Dietary iron intake  | 0.71(0.43, 1.17)        | 0.72(0.33, 1.59)       | 0.33(0.13, 0.81)       |
| Additive model       | RERI                                                 | 0.40(-0.38, 1.18)       | -0.02 (-1.64, 1.59)    | -0.14(-1.64, 1.35)     |
|                      | S                                                    | 0.29(0.28, 1.26)        | 1.05(0.03, 35.34)      | 1.22(0.11, 13.36)      |
|                      | AP                                                   | 0.94(-1.28, 3.15)       | -0.05 (-3.18, 3.08)    | -0.65(-7.01, 5.71)     |

<sup>a</sup> The relative excess risk due to interaction. <sup>b</sup> The attributable proportion. <sup>c</sup> The synergy index.<sup>d</sup> Adjusted for age, ethnicity, education, residence, wealth index, cold in early pregnancy, fever in early pregnancy, drinking, passive smoke, hair dyeing and perming, gravidity.

**Supplementary Table S4.** Interaction of folic acid and iron supplements in incidence of CHD by different sociodemographic characteristics.

| Variables                      | Folic acid                   | Iron                         | N          | Cases      | Controls   | Model <sup>c</sup> |
|--------------------------------|------------------------------|------------------------------|------------|------------|------------|--------------------|
|                                | supplementation <sup>a</sup> | supplementation <sup>b</sup> | n (%)      | n (%)      | n (%)      | OR (95%CI)         |
| Age                            |                              |                              |            |            |            |                    |
| <30                            | 0                            | 0                            | 140(11.82) | 73(19.31)  | 67(8.31)   | 1.00               |
|                                | 0                            | 1                            | 50(4.22)   | 13(3.44)   | 37(4.59)   | 0.18(0.07, 0.48)   |
|                                | 1                            | 0                            | 693(58.53) | 252(66.67) | 441(54.71) | 0.52(0.32, 0.85)   |
|                                | 1                            | 1                            | 301(25.42) | 40(10.58)  | 261(32.38) | 0.16(0.09, 0.29)   |
| ≥30                            | 0                            | 0                            | 88(14.29)  | 47(21.17)  | 41(10.41)  | 1.00               |
|                                | 0                            | 1                            | 27(4.38)   | 8(3.60)    | 19(4.82)   | 0.71(0.16, 3.11)   |
|                                | 1                            | 0                            | 349(56.65) | 142(63.96) | 207(52.54) | 1.06(0.47, 2.37)   |
|                                | 1                            | 1                            | 152(24.68) | 25(11.27)  | 127(32.23) | 0.33(0.12, 0.90)   |
| Education                      |                              |                              |            |            |            |                    |
| Senior high school<br>or lower | 0                            | 0                            | 106(19.85) | 74(28.03)  | 32(11.85)  | 1.00               |
|                                | 0                            | 1                            | 24(4.49)   | 9(3.41)    | 15(5.56)   | 0.10(0.01, 1.21)   |
|                                | 1                            | 0                            | 316(59.18) | 169(64.02) | 147(54.44) | 0.66(0.24, 1.82)   |
|                                | 1                            | 1                            | 88(16.48)  | 12(4.55)   | 76(28.15)  | 0.07(0.02, 0.32)   |
| College or above               | 0                            | 0                            | 122(9.64)  | 46(13.69)  | 76(8.17)   | 1.00               |
|                                | 0                            | 1                            | 53(4.19)   | 12(3.57)   | 41(4.41)   | 0.34(0.14, 0.87)   |
|                                | 1                            | 0                            | 726(57.35) | 225(66.96) | 501(53.87) | 0.56(0.33, 0.93)   |

|              |   |   |            |            |            |                  |
|--------------|---|---|------------|------------|------------|------------------|
|              | 1 | 1 | 365(28.83) | 53(15.77)  | 312(33.55) | 0.23(0.13, 0.42) |
| Residence    |   |   |            |            |            |                  |
| Urban        | 0 | 0 | 98(9.79)   | 30(14.93)  | 68(8.50)   | 1.00             |
|              | 0 | 1 | 38(3.80)   | 6(2.99)    | 32(4.00)   | 0.35(0.10, 1.16) |
|              | 1 | 0 | 566(56.54) | 129(64.18) | 437(54.63) | 0.70(0.36, 1.35) |
|              | 1 | 1 | 299(29.87) | 36(17.91)  | 263(32.87) | 0.35(0.16, 0.76) |
| Rural        | 0 | 0 | 130(16.27) | 90(22.56)  | 40(10.00)  | 1.00             |
|              | 0 | 1 | 39(4.88)   | 15(3.76)   | 24(6.00)   | 0.25(0.08, 0.86) |
|              | 1 | 0 | 476(59.57) | 265(66.42) | 211(52.75) | 0.68(0.38, 1.20) |
|              | 1 | 1 | 154(19.27) | 29(7.27)   | 125(31.25) | 0.18(0.08, 0.39) |
| Wealth index |   |   |            |            |            |                  |
| Poor         | 0 | 0 | 106(16.46) | 74(23.64)  | 32(9.67)   | 1.00             |
|              | 0 | 1 | 34(5.28)   | 14(4.47)   | 20(6.04)   | 0.11(0.02, 0.56) |
|              | 1 | 0 | 396(61.49) | 207(66.13) | 189(57.10) | 0.34(0.13, 0.91) |
|              | 1 | 1 | 108(16.77) | 18(5.75)   | 90(27.19)  | 0.07(0.02, 0.26) |
| Moderate     | 0 | 0 | 58(10.27)  | 27(16.17)  | 31(7.79)   | 1.00             |
|              | 0 | 1 | 15(2.65)   | 5(2.99)    | 10(2.51)   | 0.47(0.04, 6.06) |
|              | 1 | 0 | 320(56.64) | 108(64.67) | 212(53.27) | 0.53(0.17, 1.66) |
|              | 1 | 1 | 172(30.44) | 27(16.17)  | 145(36.43) | 0.30(0.09, 0.99) |
| Rich         | 0 | 0 | 64(10.83)  | 19(15.83)  | 45(9.55)   | 1.00             |
|              | 0 | 1 | 28(7.74)   | 2(1.67)    | 26(5.52)   | 0.22(0.02, 2.25) |
|              | 1 | 0 | 326(55.16) | 79(65.83)  | 247(52.44) | 0.86(0.32, 2.33) |

1 1 173(29.27) 20(16.67) 153(32.48) 0.31(0.09, 1.00)

<sup>a</sup> 0 = No and 1 = Yes. <sup>b</sup> 0 = No and 1 = Yes. <sup>c</sup> Adjusted for covariates other than subgroup variables.

**Supplementary Table S5.** Multiplicative and additive interaction indicators of folic acid and iron supplements in incidence of CHD by different sociodemographic characteristics.

| Variables                   |                      | Interactions                                      | Model <sup>d</sup> |
|-----------------------------|----------------------|---------------------------------------------------|--------------------|
| Age                         |                      |                                                   |                    |
| <30                         | Multiplication model | Folic acid supplementation × Iron supplementation | 0.28(0.18, 0.45)   |
|                             |                      |                                                   |                    |
|                             | Additive model       | RERI <sup>a</sup>                                 | 0.45(0.14, 0.77)   |
|                             |                      | S <sup>b</sup>                                    | 0.65(0.52, 0.82)   |
|                             |                      | AP <sup>c</sup>                                   | 2.84(-0.27, 5.96)  |
| ≥30                         | Multiplication model | Folic acid supplementation × Iron supplementation | 0.30(0.15, 0.62)   |
|                             |                      |                                                   |                    |
|                             | Additive model       | RERI                                              | -0.44(-1.84, 0.97) |
|                             |                      | S                                                 | - <sup>c</sup>     |
|                             |                      | AP                                                | -1.31(-5.20, 2.59) |
| Education                   |                      |                                                   |                    |
| Senior high school or lower | Multiplication model | Folic acid supplementation × Iron supplementation | 0.10(0.03, 0.37)   |
|                             |                      |                                                   |                    |
|                             | Additive model       | RERI                                              | 0.31(-0.44, 1.06)  |
|                             |                      | S                                                 | 0.75(0.42, 1.35)   |

|                  |                      |                                                   |                     |
|------------------|----------------------|---------------------------------------------------|---------------------|
|                  |                      | AP                                                | 4.69(-11.20, 20.59) |
| College or above | Multiplication model | Folic acid supplementation × Iron supplementation | 0.39(0.26, 0.59)    |
|                  |                      |                                                   |                     |
|                  | Additive model       | RERI                                              | 0.33(-0.11, 0.77)   |
|                  |                      | S                                                 | 0.70(0.48, 1.02)    |
| Residence        |                      | AP                                                | 1.42(-0.95, 3.79)   |
|                  |                      |                                                   |                     |
|                  |                      |                                                   |                     |
|                  |                      |                                                   |                     |
| Urban            | Multiplication model | Folic acid supplementation × Iron supplementation | 0.47(0.29, 0.78)    |
|                  |                      |                                                   |                     |
|                  | Additive model       | RERI                                              | 0.31(-0.29, 0.90)   |
|                  |                      | S                                                 | 0.68(0.38, 1.20)    |
| Rural            |                      | AP                                                | 0.88(-1.21, 2.97)   |
|                  |                      |                                                   |                     |
|                  |                      |                                                   |                     |
|                  |                      |                                                   |                     |
|                  | Multiplication model | Folic acid supplementation × Iron supplementation | 0.28(0.15, 0.50)    |
|                  |                      |                                                   |                     |
|                  | Additive model       | RERI                                              | 0.25(-0.27, 0.76)   |
|                  |                      | S                                                 | 0.77(0.48, 1.23)    |
| Wealth index     |                      | AP                                                | 1.38(-2.10, 4.86)   |
|                  |                      |                                                   |                     |
|                  |                      |                                                   |                     |
|                  |                      |                                                   |                     |
| Poor             | Multiplication model | Folic acid supplementation × Iron supplementation | 0.20(0.08, 0.51)    |
|                  |                      |                                                   |                     |
|                  | Additive model       | RERI                                              | 0.61(0.21, 1.02)    |
|                  |                      | S                                                 | 0.60(0.47, 0.77)    |

|          |                      |                                                   |                    |
|----------|----------------------|---------------------------------------------------|--------------------|
|          |                      | AP                                                | 8.97(-7.10, 25.04) |
| Moderate | Multiplication model | Folic acid supplementation × Iron supplementation | 0.50(0.24, 1.05)   |
|          |                      |                                                   |                    |
|          | Additive model       | RERI                                              | 0.29(-1.04, 1.62)  |
|          |                      | S                                                 | 0.71(0.19, 2.57)   |
| Rich     | Multiplication model | AP                                                | 0.98(-4.04, 6.01)  |
|          |                      | Folic acid supplementation × Iron supplementation | 0.36(0.16, 0.82)   |
|          | Additive model       | RERI                                              | 0.23(-0.72, 1.17)  |
|          |                      | S                                                 | 0.75(0.28, 2.00)   |
|          |                      | AP                                                | 0.74(-2.80, 4.29)  |

<sup>a</sup> The relative excess risk due to interaction. <sup>b</sup> The attributable proportion. <sup>c</sup> The synergy index. <sup>d</sup>

Adjusted for covariates other than subgroup variables. <sup>e</sup>. Missing data.

**Supplementary Table S6.** Interaction of maternal folic acid supplement and dietary iron intake in incidence of CHD by different sociodemographic characteristics.

| Variables | Folic acid supplementation <sup>a</sup> | Dietary iron intake <sup>b</sup> | N<br>n (%) | Cases<br>n (%) | Controls<br>n (%) | Model <sup>c</sup><br>OR (95%CI) |
|-----------|-----------------------------------------|----------------------------------|------------|----------------|-------------------|----------------------------------|
| Age       |                                         |                                  |            |                |                   |                                  |
| <30       | 0                                       | 0                                | 127(10.73) | 66(17.46)      | 61(7.57)          | 1.00                             |
|           | 0                                       | 1                                | 63(5.32)   | 20(5.29)       | 43(5.33)          | 0.28(0.12, 0.68)                 |
|           | 1                                       | 0                                | 629(53.12) | 202(53.44)     | 427(52.98)        | 0.42(0.25, 0.70)                 |



|                    |   |   |            |            |            |                  |
|--------------------|---|---|------------|------------|------------|------------------|
|                    | 1 | 1 | 365(30.83) | 90(23.81)  | 275(34.12) | 0.35(0.19, 0.63) |
| ≥30                | 0 | 0 | 82(13.31)  | 43(19.37)  | 39(9.90)   | 1.00             |
|                    | 0 | 1 | 33(5.36)   | 12(5.41)   | 21(5.33)   | 0.97(0.23, 4.13) |
|                    | 1 | 0 | 317(51.46) | 123(55.40) | 194(49.24) | 0.99(0.40, 2.42) |
|                    | 1 | 1 | 184(29.87) | 44(19.82)  | 140(35.53) | 0.59(0.21, 1.68) |
| Education          |   |   |            |            |            |                  |
| Senior high school | 0 | 0 | 96(17.98)  | 67(25.38)  | 29(10.74)  | 1.00             |
| or lower           |   |   |            |            |            |                  |
|                    | 0 | 1 | 34(6.37)   | 16(6.06)   | 18(6.67)   | 0.29(0.05, 1.80) |
|                    | 1 | 0 | 274(51.31) | 132(50.00) | 142(52.59) | 0.90(0.31, 2.59) |
|                    | 1 | 1 | 130(24.34) | 49(18.56)  | 81(30.00)  | 0.31(0.11, 0.89) |
| College or above   | 0 | 0 | 113(8.93)  | 42(12.50)  | 71(7.63)   | 1.00             |
|                    | 0 | 1 | 62(4.90)   | 16(4.76)   | 46(4.95)   | 0.41(0.17, 0.98) |
|                    | 1 | 0 | 672(53.08) | 193(57.44) | 479(51.51) | 0.48(0.27, 0.85) |
|                    | 1 | 1 | 419(33.09) | 85(25.30)  | 334(35.91) | 0.29(0.15, 0.54) |
| Residence          |   |   |            |            |            |                  |
| Urban              | 0 | 0 | 81(8.09)   | 25(12.44)  | 56(7.00)   | 1.00             |
|                    | 0 | 1 | 55(5.49)   | 11(5.47)   | 44(5.50)   | 0.45(0.15, 1.35) |
|                    | 1 | 0 | 521(52.05) | 116(57.71) | 405(50.63) | 0.74(0.34, 1.58) |
|                    | 1 | 1 | 344(34.37) | 49(24.38)  | 295(36.87) | 0.42(0.19, 0.93) |
| Rural              | 0 | 0 | 128(16.02) | 84(21.05)  | 44(11.00)  | 1.00             |
|                    | 0 | 1 | 41(5.13)   | 21(5.26)   | 20(5.00)   | 0.95(0.33, 2.70) |

|              |   |   |            |            |            |                  |
|--------------|---|---|------------|------------|------------|------------------|
|              | 1 | 0 | 425(53.19) | 209(52.38) | 216(54.00) | 0.73(0.41, 1.32) |
|              | 1 | 1 | 205(25.66) | 85(21.30)  | 120(30.00) | 0.55(0.28, 1.09) |
| Wealth index |   |   |            |            |            |                  |
| Poor         | 0 | 0 | 116(18.01) | 75(23.96)  | 41(12.39)  | 1.00             |
|              | 0 | 1 | 24(3.73)   | 13(4.15)   | 11(3.32)   | 0.78(0.12, 4.98) |
|              | 1 | 0 | 338(52.48) | 159(50.80) | 179(54.08) | 0.56(0.25, 1.26) |
|              | 1 | 1 | 166(25.78) | 66(21.09)  | 100(30.21) | 0.43(0.17, 1.08) |
| Moderate     | 0 | 0 | 41(7.26)   | 20(11.98)  | 21(5.27)   | 1.00             |
|              | 0 | 1 | 32(5.66)   | 12(7.19)   | 20(5.03)   | 0.32(0.05, 2.00) |
|              | 1 | 0 | 297(52.57) | 98(58.68)  | 199(50.00) | 0.53(0.14, 1.95) |
|              | 1 | 1 | 195(34.51) | 37(22.15)  | 158(39.70) | 0.16(0.04, 0.64) |
| Rich         | 0 | 0 | 52(8.80)   | 14(11.67)  | 38(8.07)   | 1.00             |
|              | 0 | 1 | 40(6.77)   | 7(5.83)    | 33(7.01)   | 0.57(0.12, 2.74) |
|              | 1 | 0 | 311(52.62) | 68(56.67)  | 243(51.59) | 0.78(0.27, 2.28) |
|              | 1 | 1 | 188(31.81) | 31(25.83)  | 157(33.33) | 0.65(0.19, 2.25) |

<sup>a</sup> 0 = No and 1 = Yes. <sup>b</sup> 0 = "<29 mg/d", 1 = "≥29 mg/d". <sup>c</sup> Adjusted for covariates other than subgroup variables.

**Supplementary Table S7.** Multiplication and additive interaction indicators of folic acid supplement and dietary iron intake on CHD by different sociodemographic characteristics.

| Variables | Interactions | Model <sup>d</sup> |
|-----------|--------------|--------------------|
| Age       |              |                    |

|                                |                      |                                                |                    |
|--------------------------------|----------------------|------------------------------------------------|--------------------|
| <30                            | Multiplication model | Folic acid supplementation×Dietary iron intake | 0.79(0.60, 1.00)   |
|                                | Additive model       | RERI <sup>a</sup>                              | 0.65(0.35, 0.94)   |
|                                |                      | S <sup>b</sup>                                 | 0.50(0.40, 0.63)   |
|                                |                      | AP <sup>c</sup>                                | 1.86(0.28, 3.44)   |
| ≥30                            | Multiplication model | Folic acid supplementation×Dietary iron intake | 0.63(0.46, 0.88)   |
|                                | Additive model       | RERI                                           | -0.37(-2.08, 1.35) |
|                                |                      | S                                              | - <sup>e</sup>     |
|                                |                      | AP                                             | -0.62(-3.38, 2.14) |
| Education                      |                      |                                                |                    |
| Senior high school<br>or lower | Multiplication model | Folic acid supplementation×Dietary iron intake | 0.71(0.52, 0.97)   |
|                                | Additive model       | RERI                                           | 0.12(-0.96, 1.18)  |
|                                |                      | S                                              | 0.86(0.24, 3.12)   |
|                                |                      | AP                                             | 0.38(-3.33, 4.08)  |
| College or above               | Multiplication model | Folic acid supplementation×Dietary iron intake | 0.74(0.57, 0.94)   |
|                                | Additive model       | RERI                                           | 0.40(-0.04, 0.84)  |
|                                |                      | S                                              | 0.64(0.45, 0.92)   |
|                                |                      | AP                                             | 1.38(-0.74, 3.51)  |
| Residence                      |                      |                                                |                    |
| Urban                          | Multiplication model | Folic acid supplementation×Dietary iron intake | 0.62(0.45, 0.86)   |
|                                | Additive model       | RERI                                           | 0.23(-0.47, 0.94)  |
|                                |                      | S                                              | 0.71(0.33, 1.54)   |

|              |                      |                                                |                    |
|--------------|----------------------|------------------------------------------------|--------------------|
|              |                      | AP                                             | 0.56(-1.45, 2.58)  |
| Rural        | Multiplication model | Folic acid supplementation×Dietary iron intake | 0.81(0.64, 1.03)   |
|              | Additive model       | RERI                                           | -0.13(-1.21, 0.96) |
|              |                      | S                                              | 1.40(0.04, 46.22)  |
|              |                      | AP                                             | -0.23(-2.14, 1.68) |
| Wealth index |                      |                                                |                    |
| Poor         | Multiplication model | Folic acid supplementation×Dietary iron intake | 0.84(0.64, 1.11)   |
|              | Additive model       | RERI                                           | 0.09(-1.44, 1.62)  |
|              |                      | S                                              | 0.86(0.09, 8.39)   |
|              |                      | AP                                             | 0.22(-3.43, 3.86)  |
| Moderate     | Multiplication model | Folic acid supplementation×Dietary iron intake | 0.55(0.38, 0.80)   |
|              | Additive model       | RERI                                           | 0.31(-0.64, 1.25)  |
|              |                      | S                                              | 0.73(0.34, 1.59)   |
|              |                      | AP                                             | 1.96(-6.20, 10.12) |
| Rich         | Multiplication model | Folic acid supplementation×Dietary iron intake | 0.77(0.51, 1.16)   |
|              | Additive model       | RERI                                           | 0.30(-0.77, 1.36)  |
|              |                      | S                                              | 0.54(0.10, 2.77)   |
|              |                      | AP                                             | 0.46(-1.44, 2.36)  |

<sup>a</sup> The relative excess risk due to interaction. <sup>b</sup> The attributable proportion. <sup>c</sup> The synergy index. <sup>d</sup>

Adjusted for covariates other than subgroup variables. <sup>e</sup> Missing data.
